# Supplementary material
Source: publisher site journal article supplement (https://www.spandidos-publications.com/30/downloadSupplementary)

Figure S1. Relationship between *FOXO3* and *miR-122-5p* in a GC cell line. (A) Comparison of *FOXO3* levels between the negative control and the overexpression of *miR-122-5p* in the NUGC-3 cell line as determined by qRT-PCR. (B) Comparison of the protein expression of FOXO3 between the negative control and the overexpression of *miR-122-5p* in the NUGC-3 cell line as revealed by western blotting. GC, gastric cancer; qRT-PCR, quantitative reverse transcription-polymerase chain reaction; NC, negative control.

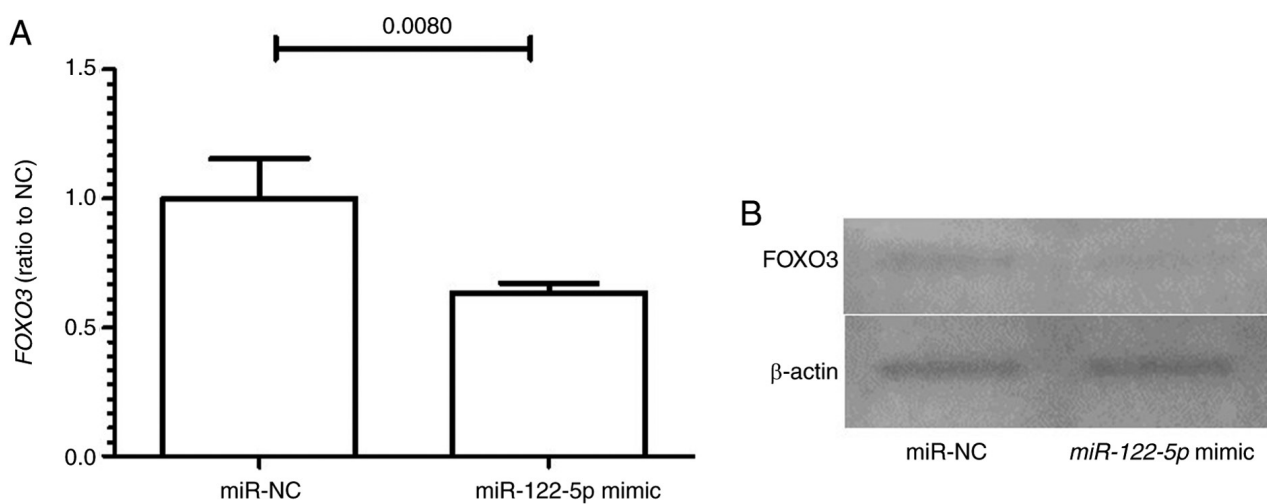

Supplement: Supplementary file 1 [file downloadSupplementary]
